# Supplementary material for: Molecular Basis of Bcl-XL-p53 Interaction: Insights from Molecular Dynamics Simulations
Source: PubMed Central journal article supplement (PMC3198449; doi:10.1371/journal.pone.0026014), 2011-10-19

Figure S1A.

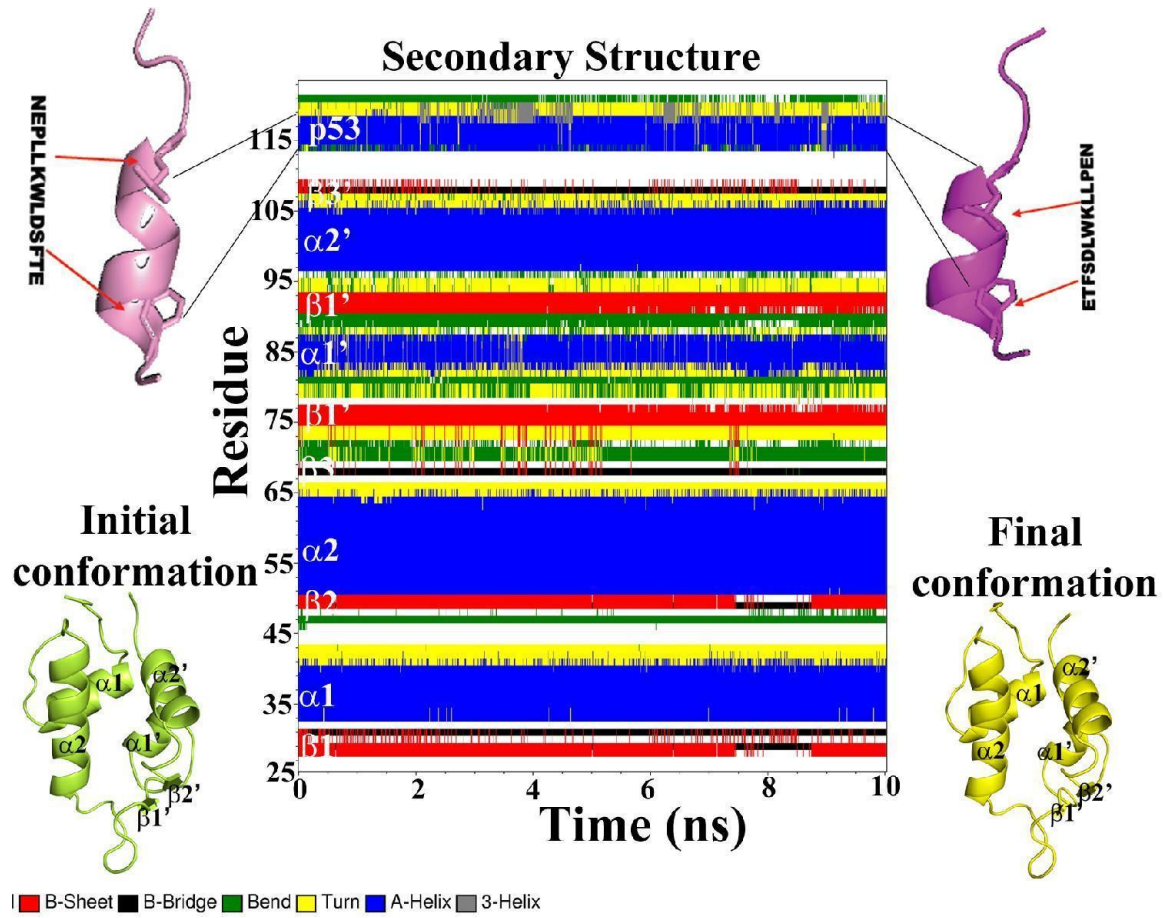

Figure S1B.

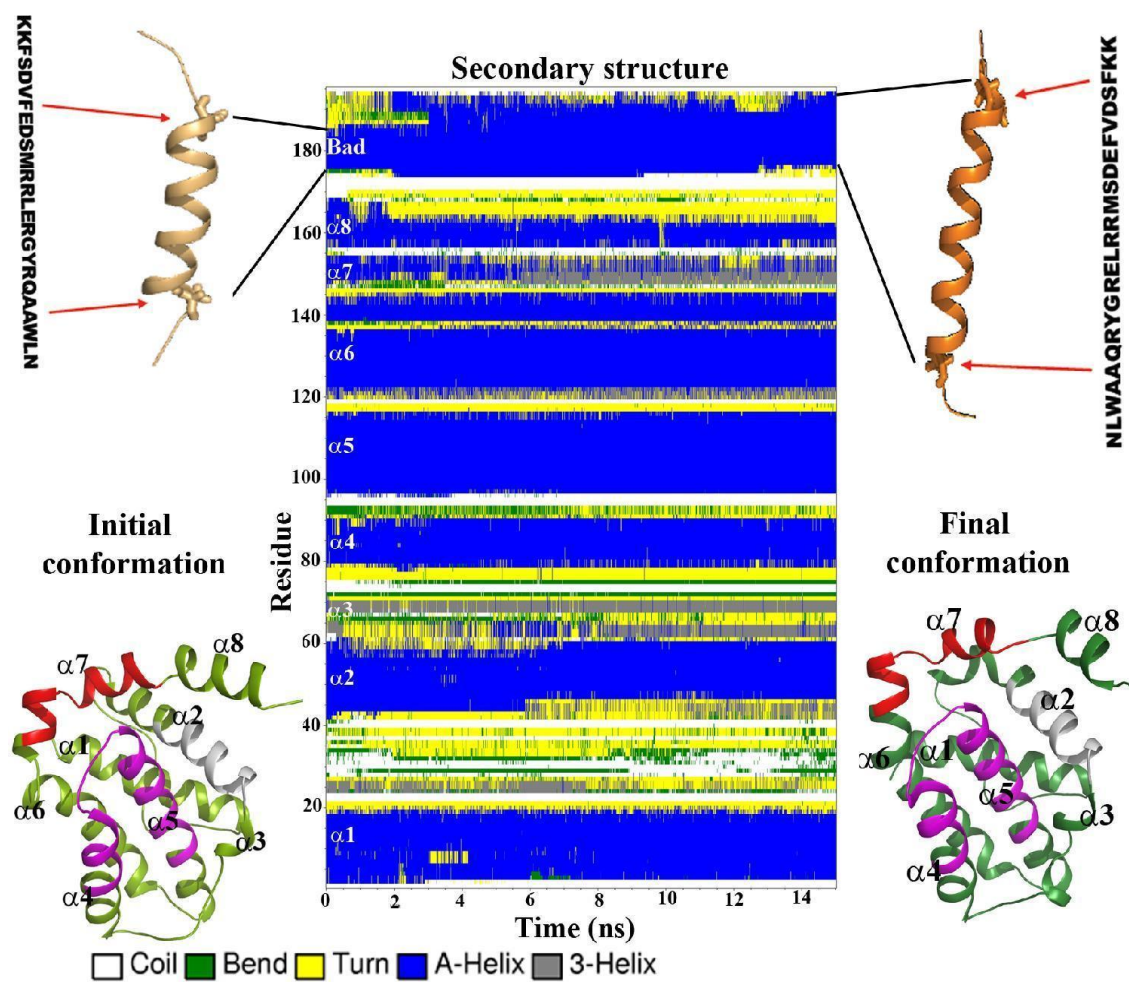

Figure S1C.

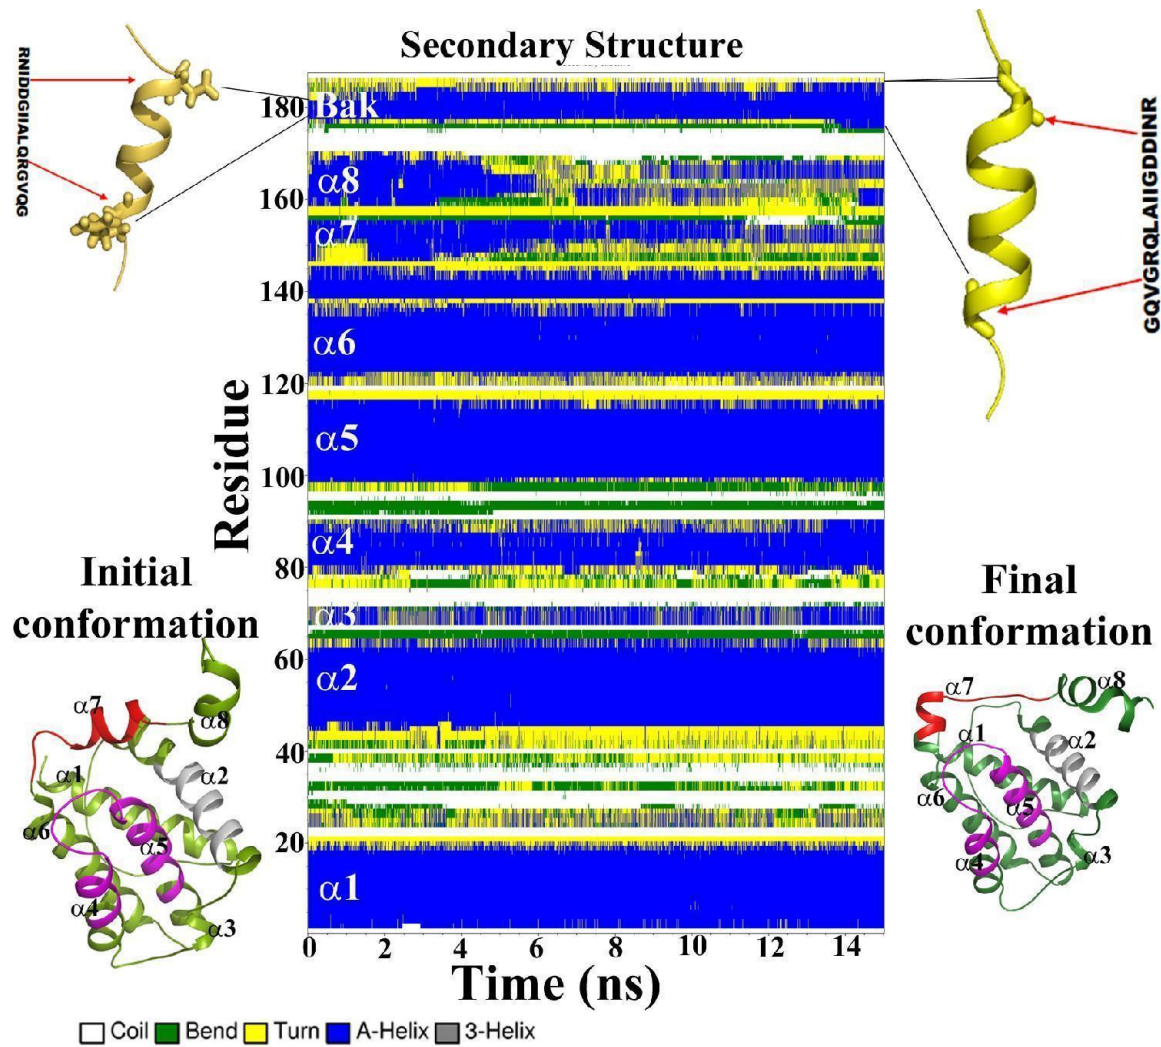



Figure S1D.

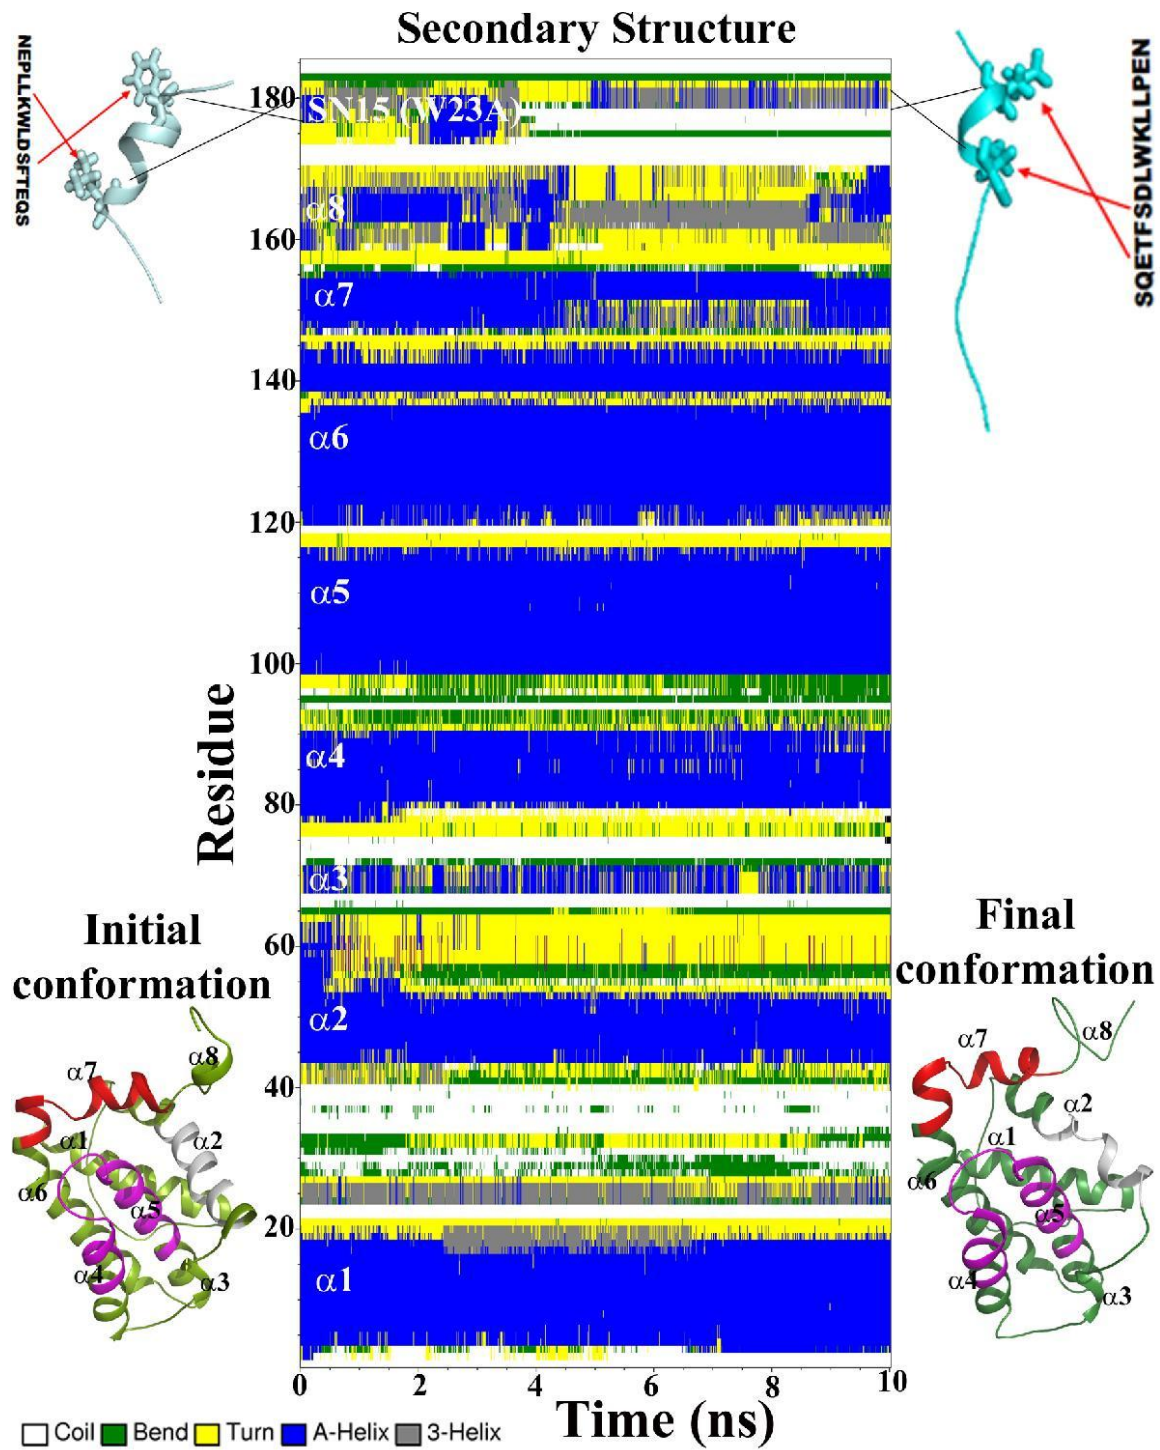

Supplement: pone.0026014.s001.pdf [file pone.0026014.s001.pdf]
