# Supplementary material for: Molecular Basis of Bcl-XL-p53 Interaction: Insights from Molecular Dynamics Simulations
Source: PubMed Central journal article supplement (PMC3198449; doi:10.1371/journal.pone.0026014), 2011-10-19

Figure S5A.

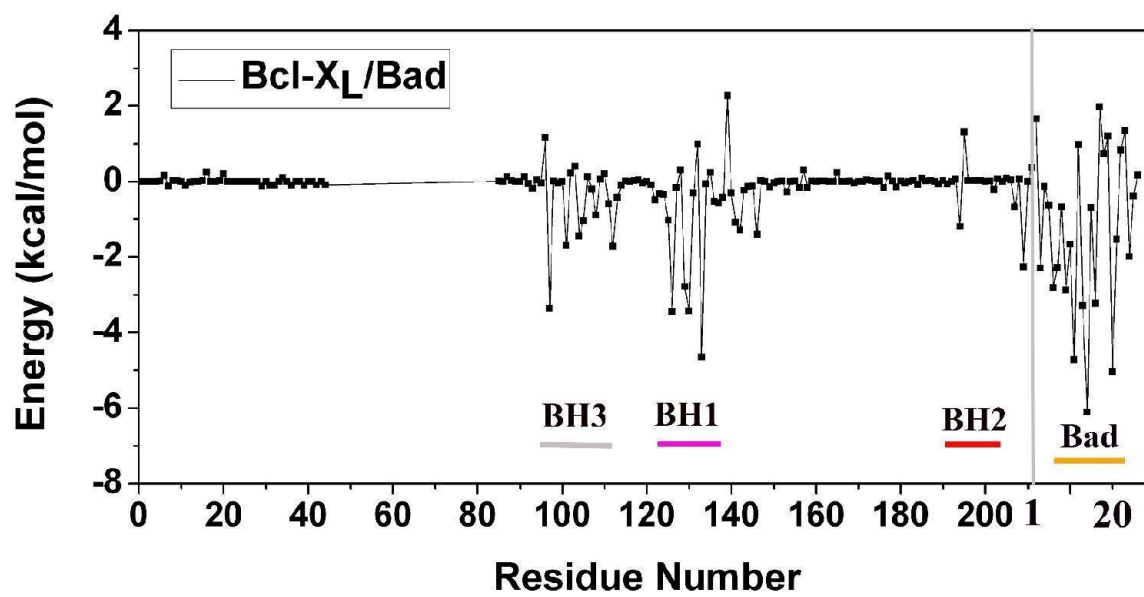

Figure S5B.

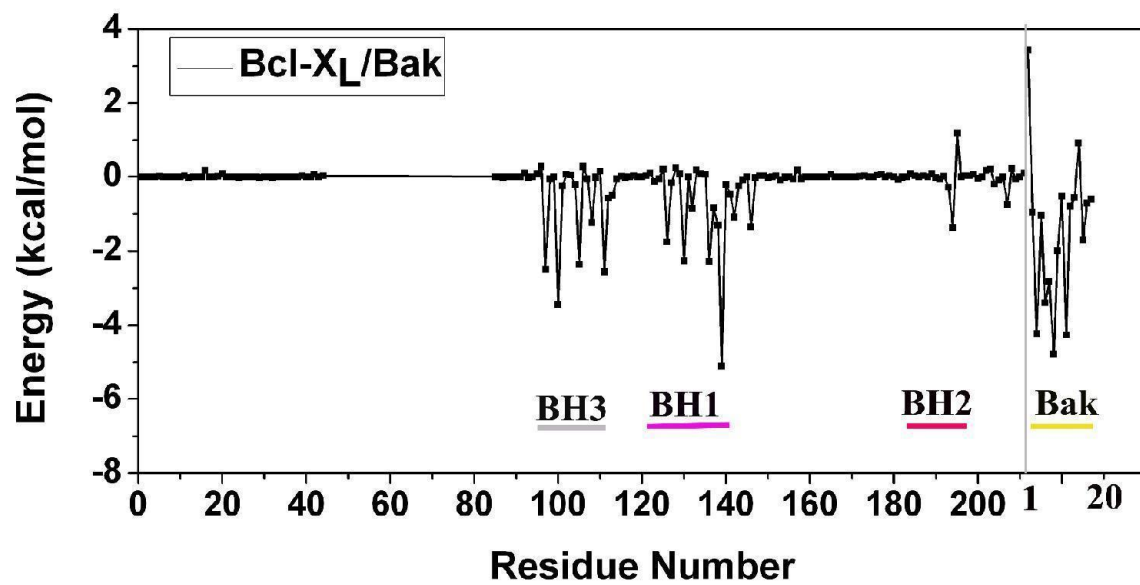

Figure S5C.

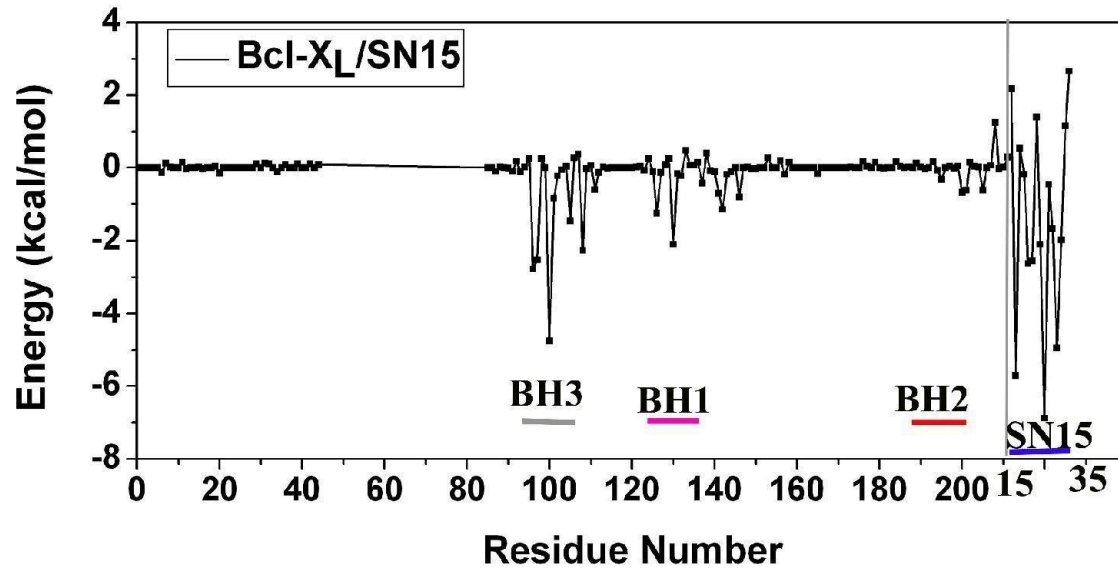

Figure S5D.

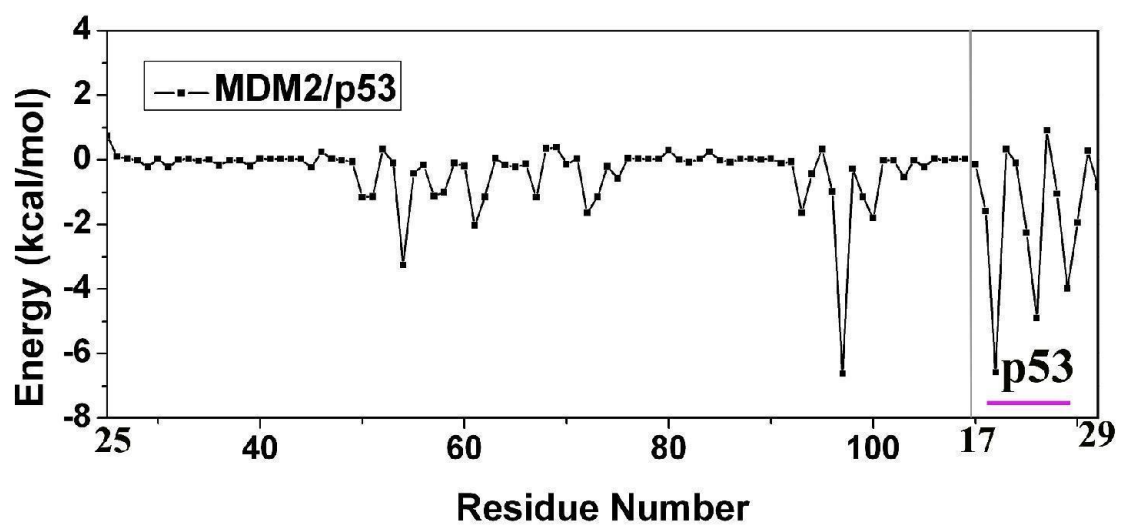

Supplement: pone.0026014.s005.pdf [file pone.0026014.s005.pdf]
