# Supplementary material for: Molecular Basis of Bcl-XL-p53 Interaction: Insights from Molecular Dynamics Simulations
Source: PubMed Central journal article supplement (PMC3198449; doi:10.1371/journal.pone.0026014), 2011-10-19
Supplement: pone.0026014.s007.pdf [file pone.0026014.s007.pdf]

**Table S1. Components of binding free energy (in kcal/mol) of Bcl-XL with Bad peptide**

|                                            | <b>Bcl-XL/Bad</b> |             | <b>Bcl-XL</b>  |             | <b>Bad</b>     |             | <b>Delta</b> |
|--------------------------------------------|-------------------|-------------|----------------|-------------|----------------|-------------|--------------|
|                                            | <b>Average</b>    | <b>Std</b>  | <b>Average</b> | <b>Std</b>  | <b>Average</b> | <b>Std</b>  |              |
| ELE                                        | -6093.7           | 108.3       | -4657.6        | 100.3       | -938.9         | 42.0        | -497.2       |
| VDW                                        | -749.5            | 25.7        | -585.7         | 22.4        | -46.2          | 8.0         | -117.6       |
| GAS                                        | -3181.2           | 114.8       | -2048.9        | 105.1       | -517.5         | 43.4        | -614.8       |
| PBSUR                                      | 62.6              | 1.84        | 58.4           | 1.19        | 17.7           | 0.34        | -13.4        |
| PB                                         | -3669.5           | 117.3       | -3490.5        | 106.0       | -736.3         | 39.2        | 557.3        |
| PBSOL                                      | -3606.9           | 115.9       | -3432.1        | 105.1       | -718.6         | 39.2        | 543.9        |
| PBELE                                      | -9763.2           | 38.6        | -8148.1        | 32.9        | -1675.2        | 9.54        | 60.0         |
| <b>PBTOT</b>                               | <b>-6788.1</b>    | <b>50.6</b> | <b>-5481.0</b> | <b>46.9</b> | <b>-1236.2</b> | <b>16.5</b> | <b>-71.0</b> |
| TSTRA                                      | 16.8              | 0           | 16.6           | 0           | 15.0           | 0           | -14.9        |
| TSROT                                      | 17.0              | 0           | 16.8           | 0           | 14.4           | 0           | -14.2        |
| TSVIB                                      | 2234.3            | 9.0         | 1934.0         | 7.0         | 324.5          | 2.2         | -24.2        |
| <b>TSTOT</b>                               | <b>2268.1</b>     | <b>9.0</b>  | <b>1967.5</b>  | <b>7.0</b>  | <b>353.9</b>   | <b>2.2</b>  | <b>-53.3</b> |
| <b><math>\Delta G_{\text{bind}}</math></b> |                   |             |                |             |                |             | <b>-17.7</b> |

Electrostatic energy (ELE); van der Waals contribution (VDW); total gas phase energy (GAS); nonpolar contribution to the solvation free energy (PBSUR); the electrostatic contribution to the solvation free energy (PB); sum of nonpolar and polar contributions to solvation (PBSOL); sum of the electrostatic solvation free energy and MM electrostatic energy (PBELE); final estimated binding free energy (PBTOT); translational energy (TSTRA); rotational energy (TSROT); vibrational energy (TSVIB), total entropic contribution (TSTOT); binding free energy ( $\Delta G_{\text{bind}}$ )
