# Supplementary material for: Molecular Basis of Bcl-XL-p53 Interaction: Insights from Molecular Dynamics Simulations
Source: PubMed Central journal article supplement (PMC3198449; doi:10.1371/journal.pone.0026014), 2011-10-19
Supplement: pone.0026014.s008.pdf [file pone.0026014.s008.pdf]

**Table S2. Components of binding free energy (in kcal/mol) of Bcl-XL with Bak peptide**

|                                            | <b>Bcl-XL/Bak</b> |             | <b>Bcl-XL</b>  |             | <b>Bak</b>     |             | <b>Delta</b> |
|--------------------------------------------|-------------------|-------------|----------------|-------------|----------------|-------------|--------------|
|                                            | <b>Average</b>    | <b>Std</b>  | <b>Average</b> | <b>Std</b>  | <b>Average</b> | <b>Std</b>  |              |
| ELE                                        | -5544.6           | 93.2        | -4575.1        | 74.4        | -639.7         | 24.1        | -329.7       |
| VDW                                        | -687.3            | 24.0        | -590.7         | 22.4        | -6.1           | 7.0         | -90.5        |
| GAS                                        | -2745.3           | 101.4       | -1965.8        | 82.9        | -359.3         | 26.7        | -420.2       |
| PBSUR                                      | 57.3              | 1.2         | 56.9           | 1.1         | 11.8           | 0.3         | -11.4        |
| PB                                         | -3625.7           | 82.5        | -3510.0        | 65.4        | -485.4         | 23.6        | 369.6        |
| PBSOL                                      | -3568.4           | 81.9        | -3453.0        | 64.8        | -473.5         | 23.5        | 358.2        |
| PBELE                                      | -9170.3           | 35.4        | -8085.1        | 33.5        | -1125.1        | 6.1         | 39.9         |
| <b>PBTOT</b>                               | <b>-6313.8</b>    | <b>50.6</b> | <b>-5418.8</b> | <b>47.5</b> | <b>-832.9</b>  | <b>13.0</b> | <b>-62.1</b> |
| TSTRA                                      | 16.7              | 0           | 16.6           | 0           | 14.5           | 0           | -14.4        |
| TSROT                                      | 16.9              | 0           | 16.8           | 0           | 13.5           | 0           | -13.4        |
| TSVIB                                      | 2105.9            | 6.1         | 1940.1         | 6.5         | 187.9          | 3.4         | -22.0        |
| <b>TSTOT</b>                               | <b>2139.5</b>     | <b>6.1</b>  | <b>1973.5</b>  | <b>6.5</b>  | <b>215.8</b>   | <b>3.5</b>  | <b>-49.8</b> |
| <b><math>\Delta G_{\text{bind}}</math></b> |                   |             |                |             |                |             | <b>-12.3</b> |

Electrostatic energy (ELE); van der Waals contribution (VDW); total gas phase energy (GAS); nonpolar contribution to the solvation free energy (PBSUR); the electrostatic contribution to the solvation free energy (PB); sum of nonpolar and polar contributions to solvation (PBSOL); sum of the electrostatic solvation free energy and MM electrostatic energy (PBELE); final estimated binding free energy (PBTOT); translational energy (TSTRA); rotational energy (TSROT); vibrational energy (TSVIB), total entropic contribution (TSTOT); binding free energy ( $\Delta G_{\text{bind}}$ )
