# Supplementary material for: Molecular Basis of Bcl-XL-p53 Interaction: Insights from Molecular Dynamics Simulations
Source: PubMed Central journal article supplement (PMC3198449; doi:10.1371/journal.pone.0026014), 2011-10-19
Supplement: pone.0026014.s009.pdf [file pone.0026014.s009.pdf]

**Table S3. Components of binding free energy (in kcal/mol) of Bcl-XL with SN15W23A peptide**

|                                     | Bcl-XL-SN15W23A |             | Bcl-XL         |             | SN15W23A      |             | Delta        |
|-------------------------------------|-----------------|-------------|----------------|-------------|---------------|-------------|--------------|
|                                     | Average         | Std         | Average        | Std         | Average       | Std         |              |
| ELE                                 | -4878.4         | 77.2        | -4762.8        | 78.7        | -351.7        | 31.7        | 236.1        |
| VDW                                 | -647.8          | 26.1        | -576.7         | 25.2        | 0.8           | 5.8         | -71.9        |
| GAS                                 | -2041.7         | 87.2        | -2129.9        | 87.6        | -76.0         | 32.5        | 164.2        |
| PBSUR                               | 60.4            | 1.4         | 58.6           | 1.3         | 11.9          | 0.2         | -10.0        |
| PB                                  | -3961.1         | 75.0        | -3335.3        | 79.0        | -436.8        | 30.2        | -188.9       |
| PBSOL                               | -3900.7         | 74.3        | -3276.7        | 78.2        | -425.0        | 30.1        | -199.0       |
| PBELE                               | -8839.5         | 29.9        | -8098.1        | 28.6        | -788.5        | 6.5         | 47.1         |
| <b>PBTOT</b>                        | <b>-5942.3</b>  | <b>46.4</b> | <b>-5406.6</b> | <b>44.1</b> | <b>-501.0</b> | <b>12.5</b> | <b>-34.8</b> |
| TSTRA                               | 16.7            | 0           | 16.6           | 0           | 14.4          | 0           | -14.3        |
| TSROT                               | 16.9            | 0           | 16.8           | 0           | 13.4          | 0           | -13.3        |
| TSVIB                               | 2106.5          | 6.2         | 1939.0         | 5.2         | 176.8         | 2.8         | -9.3         |
| <b>TSTOT</b>                        | <b>2140.1</b>   | <b>6.2</b>  | <b>1972.5</b>  | <b>5.2</b>  | <b>204.6</b>  | <b>2.8</b>  | <b>-37.0</b> |
| <b><math>\Delta G_{bind}</math></b> |                 |             |                |             |               |             | <b>2.2</b>   |

Electrostatic energy (ELE); van der Waals contribution (VDW); total gas phase energy (GAS); nonpolar contribution to the solvation free energy (PBSUR); the electrostatic contribution to the solvation free energy (PB); sum of nonpolar and polar contributions to solvation (PBSOL); sum of the electrostatic solvation free energy and MM electrostatic energy (PBELE); final estimated binding free energy (PBTOT); translational energy (TSTRA); rotational energy (TSROT); vibrational energy (TSVIB), total entropic contribution (TSTOT); binding free energy ( $\Delta G_{bind}$ )
